# Supplementary material for: Kinetically controlled synthesis of low-strain disordered micro–nano high voltage spinel cathodes with exposed {111} facets
Source: Royal Society of Chemistry journal article supplement (doi:10.1039/d4sc02754j), 2024-01-01
Supplement: d4sc02754j1.pdf [file d4sc02754j1.pdf]

## **Kinetically controlled synthesis of low-strain disordered micro-nano high voltage spinel cathodes with exposed {111} facets**

*Zhi-Qi Li<sup>[a, b]</sup>, Yi-Feng Liu<sup>[a, b]</sup>, Han-Xiao Liu<sup>[a, b]</sup>, Yan-Fang Zhu<sup>\*[a, b]</sup>, Jingqiang Wang<sup>[a, b]</sup>, Mengke Zhang<sup>[c]</sup>, Lang Qiu<sup>\*[c]</sup>, Xiao-Dong Guo<sup>[c]</sup>, Shu-Lei Chou<sup>\*[a, b]</sup> and Yao Xiao<sup>\*[a, b, d]</sup>*

[a] College of Chemistry and Materials Engineering, Wenzhou University, Wenzhou, 325035, P.R. China.

[b] Wenzhou Key Laboratory of Sodium-Ion Batteries, Wenzhou University Technology Innovation Institute for Carbon Neutralization, Wenzhou, 325035, P.R. China.

[c] College of Chemical Engineering, Sichuan University, Chengdu, 610065, P.R. China.

[d] Key Laboratory of Advanced Energy Materials Chemistry (Ministry of Education), Nankai University, Tianjin 300071, P.R. China.

\*Corresponding authors.

E-mail addresses: yanfangzhu@wzu.edu.cn; qiulang2023@scu.edu.cn; chou@wzu.edu.cn; xiaoyao@wzu.edu.cn.

Keywords: lithium-ion batteries, cathode materials, {111} facets, micro-nano structure, order-disorder

## 1. Experimental Section

### 1.1 Materials synthesis

The sample  $\text{LiNi}_{0.5}\text{Mn}_{1.5}\text{O}_4$  was synthesized by a simple carbonate coprecipitation method and subsequent solid-state reaction. The 100 mL aqueous solution consisting of nickel sulfate hexahydrate ( $\text{NiSO}_4 \cdot 6\text{H}_2\text{O}$ , Sigma-Aldrich, 99.9%) and manganese sulfate monohydrate ( $\text{MnSO}_4 \cdot \text{H}_2\text{O}$ , Sigma-Aldrich, 99.99%) (cationic ratio of Ni/Mn=1:3) with a concentration of  $2.0 \text{ mol L}^{-1}$  were added dropwise to a tank reactor under vigorous stirring. Meanwhile, appropriate amount of  $0.2 \text{ mol L}^{-1}$   $\text{NH}_4\text{OH}$  solution and 120 ml of  $2.0 \text{ mol L}^{-1}$   $\text{Na}_2\text{CO}_3$  solution were also separately pumped into the reactor. In the precipitation process, the reaction temperature was maintained at  $52 \text{ }^\circ\text{C}$  and the pH value of the mixed solution was controlled at about 7.5, respectively. After being stirred for 4 h, the precipitate was filtrated and washed with distilled water and absolute ethanol several times to remove residual sodium and sulfuric species. After that, the precursors were dried in a vacuum oven at  $80 \text{ }^\circ\text{C}$  for 24 h. The obtained spherical  $(\text{Ni}_{0.25}\text{Mn}_{0.75})\text{CO}_3$  precursor was ground uniformly with a stoichiometric amount of  $\text{Li}_2\text{CO}_3$  (5% excess owing to the lithium volatility during calcination). The mixtures were first calcined at  $900 \text{ }^\circ\text{C}$  for 12 h and then cooled to  $650 \text{ }^\circ\text{C}$  in 6 h. In addition, the furnace maintained the temperature at  $650 \text{ }^\circ\text{C}$  for another 6 h and cooled to room temperature at a cooling rate of  $1 \text{ }^\circ\text{C min}^{-1}$  to obtain the final product (denoted as LNMO-111). All the heat treatment processes were carried out in the air atmosphere.

### 1.2 Materials Characterizations

The elementary composition was determined using inductively coupled plasma mass spectrometry (ICP-MS). X-ray diffraction (XRD) pattern analysis was carried out within the range of  $10^\circ$  to  $80^\circ$  using a Bruker D8 Advance Diffractometer with a  $\text{Cu K}\alpha$  radiation source ( $\lambda_1 = 1.54056 \text{ \AA}$ ,  $\lambda_2 = 1.54439 \text{ \AA}$ ). The morphology was examined through scanning electron microscopy conducted on a field-emission microscope (SU-8020, Hitachi Limited Corporation, Japan). Further analysis involved the use of a JEOL TEM (JEM 2100F, JEOL Limited Corporation, Japan) with an acceleration voltage of 200 kV to study high-resolution transmission electron

microscopy images and energy dispersive spectroscopy mapping. X-ray photoelectron spectra were obtained from the ESCALab 250Xi (Thermo Scientific) spectrometer equipped with an Al K $\alpha$  achromatic X-ray source. The final analysis involved capturing a high-angle annular dark field image using a JEOL ARM200F (JEOL, Tokyo, Japan) STEM equipped with two CEOS (CEOS, Heidelberg, Germany) probe aberration correctors at 200 kV.

### 1.3 Electrochemical Measurements

The cathodes were tested in CR2032 coin-type half-cells alongside lithium metal as counter electrodes. These cells were constructed in an argon-filled glove box, with water and oxygen levels carefully maintained below 0.1 ppm. Preparation of the cathode slurry involved dispersing the as-prepared cathode material, super P carbon, and polyvinylidene fluoride (PVDF, binder) in N-Methylpyrrolidone (NMP) at a weight ratio of 80:10:10. Subsequently, the mixed slurry was spread on an aluminum foil current collector and dried at 80 °C for 12 h under vacuum. The resulting electrode was then punched into a disk with an area of 0.785 cm<sup>2</sup>, with the loading mass of active material reaching approximately 2.5 mg cm<sup>-2</sup>. For the electrochemical tests, a traditional carbonate electrolyte consisting of 1M LiPF<sub>6</sub> in ethylene carbonate (EC)/dimethyl carbonate (DMC)/diethyl carbonate (DEC) (in a 1:1:1 volume ratio) was employed. To separate the cathode and anode, a porous polypropylene film (Celgard 2400) was used. The galvanostatic tests on the NEWARE Battery Test System (Shenzhen, China) involved different rates (1C = 147 mA h g<sup>-1</sup>) over a voltage range of 3.5-4.9 V (*vs* Li<sup>+</sup>/Li) and the cells were charged and discharged at the same current density.

## 2. Supporting figures and text

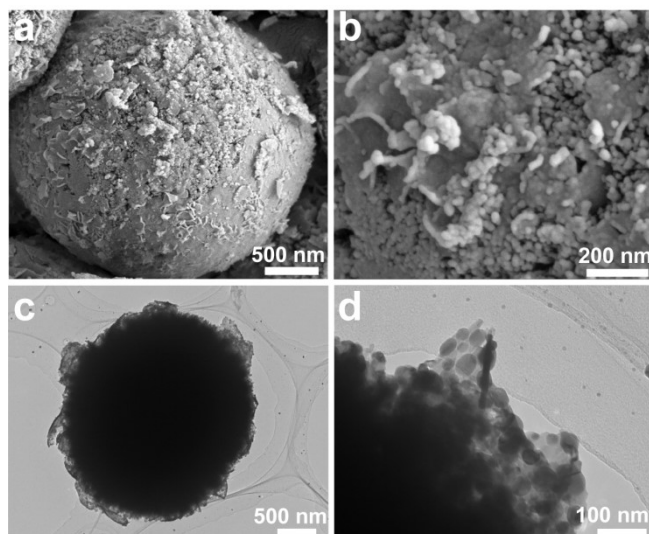

**Figure S1.** (a-b) SEM images of spherical  $(\text{Ni}_{0.25}\text{Mn}_{0.75})\text{CO}_3$  precursor at different magnifications.

(c-d) TEM images of spherical  $(\text{Ni}_{0.25}\text{Mn}_{0.75})\text{CO}_3$  precursor at different magnifications.

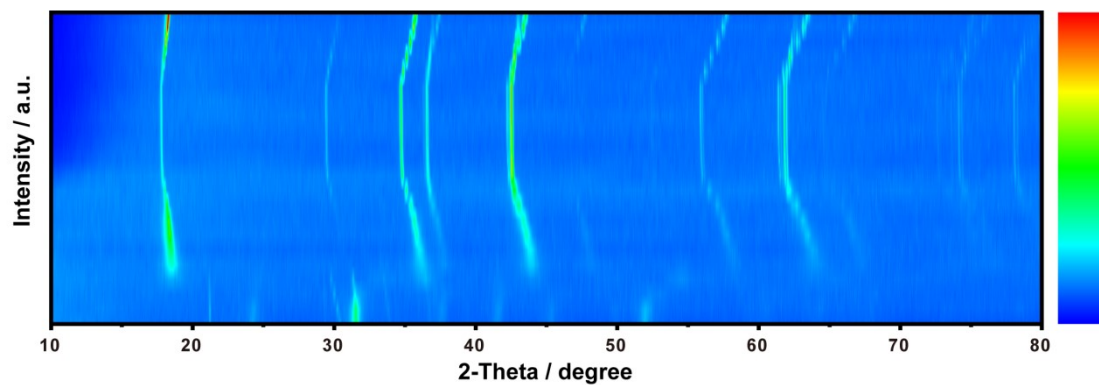

**Figure S2.** Contour plot of the evolution of the characteristic diffraction peaks between 10° and 80° of  $\text{Ni}_{0.5}\text{Mn}_{1.5}\text{CO}_3$  precursor.

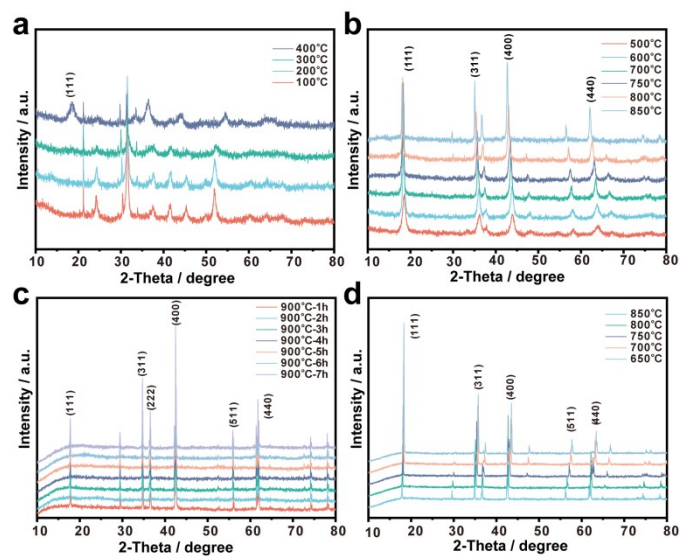

**Figure S3.** The structure transformation of  $\text{LiNi}_{0.5}\text{Mn}_{1.5}\text{O}_4$  in different calcination temperature ranges. (a) Heating from 100 °C to 400 °C. (b) Heating from 500 °C to 850 °C. (c) maintaining at 900 °C. (d) Cooling from 850 °C to 650 °C.

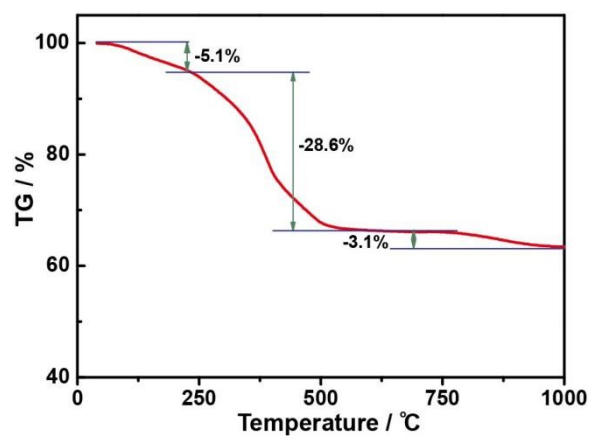

**Figure S4.** TG of spherical  $(\text{Ni}_{0.25}\text{Mn}_{0.75})\text{CO}_3$  precursor grinded uniformly with a stoichiometric amount of  $\text{Li}_2\text{CO}_3$ .

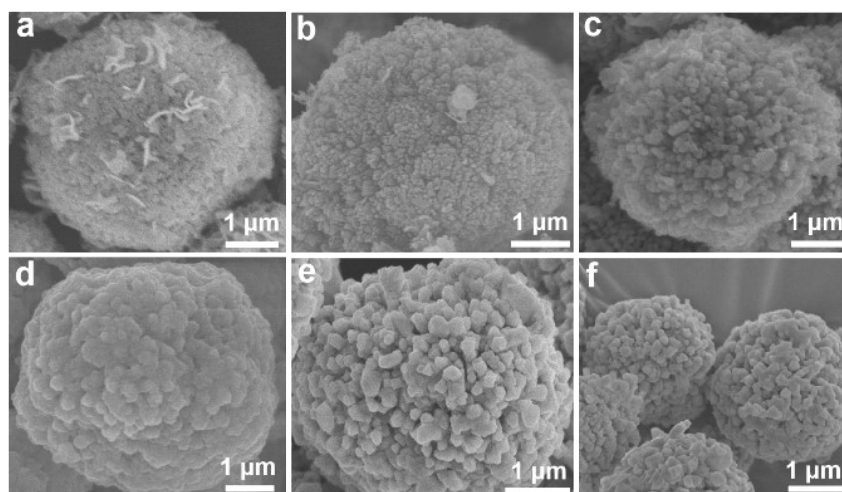

**Figure S5.** SEM images of precursor of LNMO-111 at different temperatures.



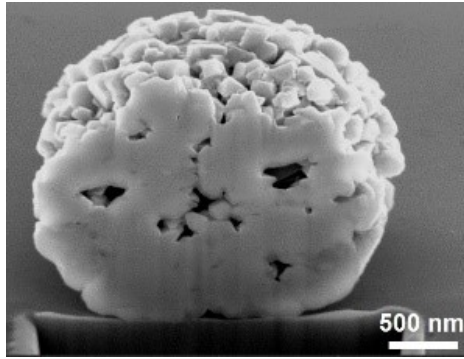

**Figure S6.** (a) Cross-sectional SEM image by FIB of LNMO-111 at different sites.

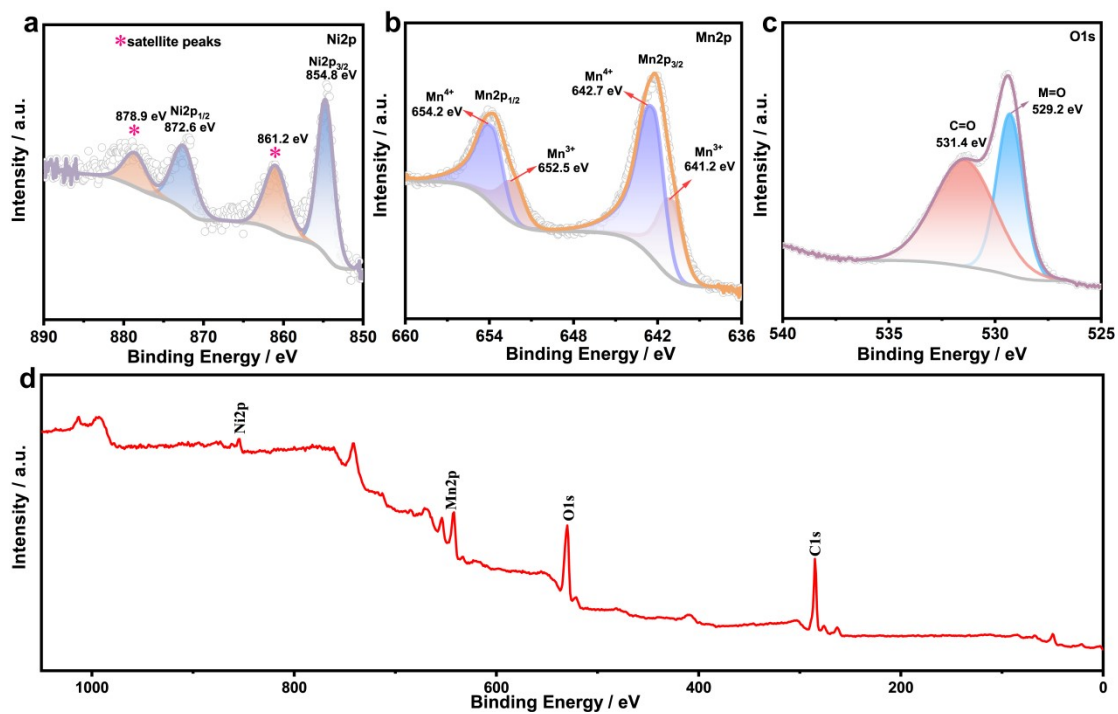

**Figure S7.** XPS spectra of LNMO-111 for (a) Ni 2p, (b) Mn 2p, (c) O 1s, (d) survey line, indicating nickel, manganese, and oxygen elements are in a valence state of +2, +3/+4, and -2, respectively.

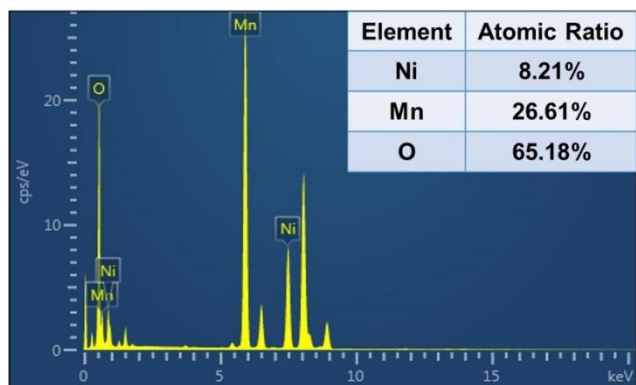

**Figure S8.** EDS image of LNMO-111.

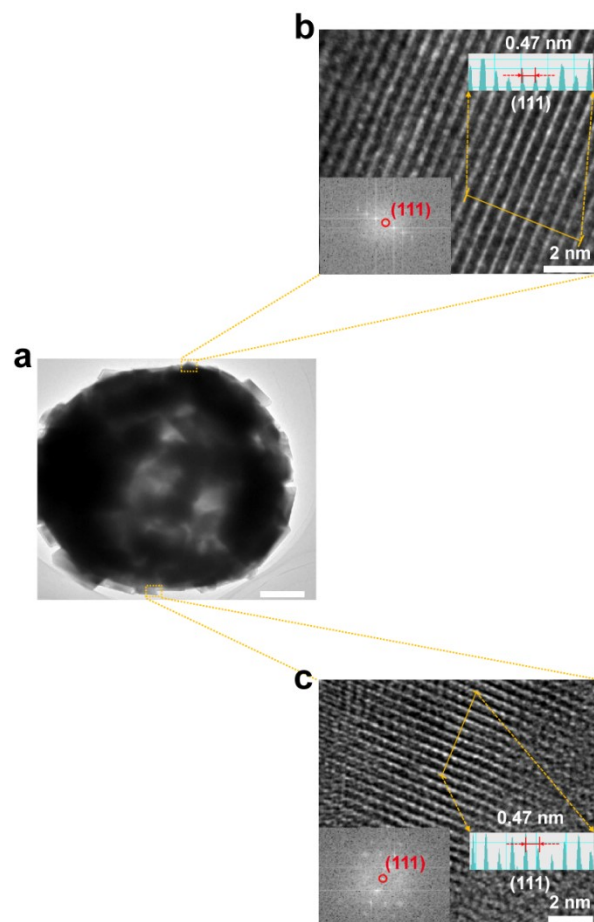

**Figure S9.** (a-c) TEM image and corresponding HR-TEM images of selected areas in LNMO-111.

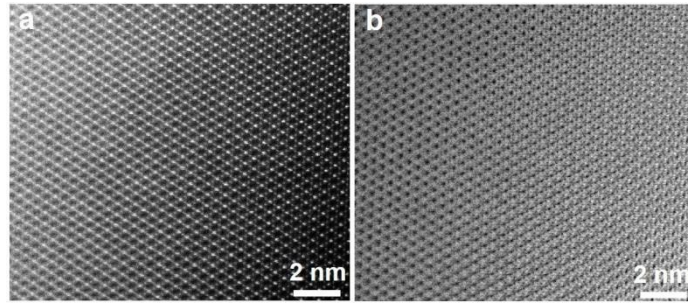

**Figure S10.** (a, b) HAADF- and ABF-STEM images of LNMO-111 viewed along the [110] axis.

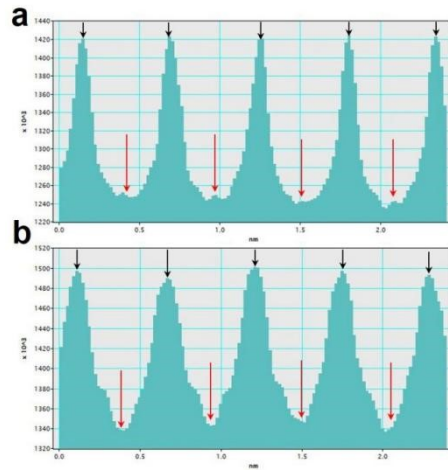

**Figure S11.** (a, b) Line profiles (HAADF-STEM image) of the surface and the subsurface of LNMO-111, indicating the Mn (Ni) octahedral sites (black arrows) and the empty octahedral sites (red arrows), respectively.

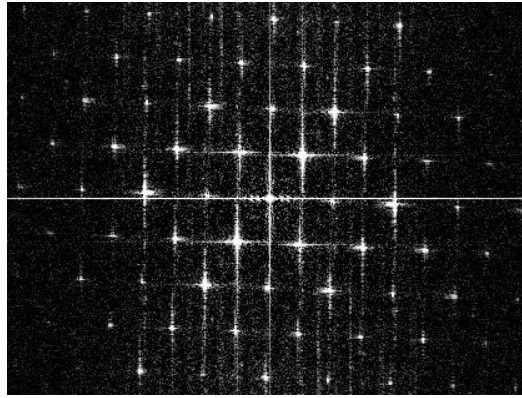

**Figure S12.** Typical FFT image (HAADF-STEM image) of LNMO-111 viewed along the [110] axis.

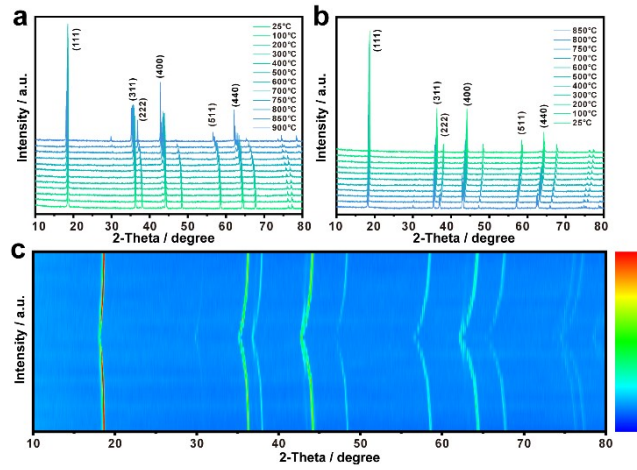

**Figure S13.** The structure transformation of NMO-111 in different temperature ranges. (a) Heating from 25 °C to 900 °C. (b) Cooling from 850 °C to 25 °C. (c) Contour plot of the evolution of the characteristic diffraction peaks between 10° and 80° of LNMO-111.



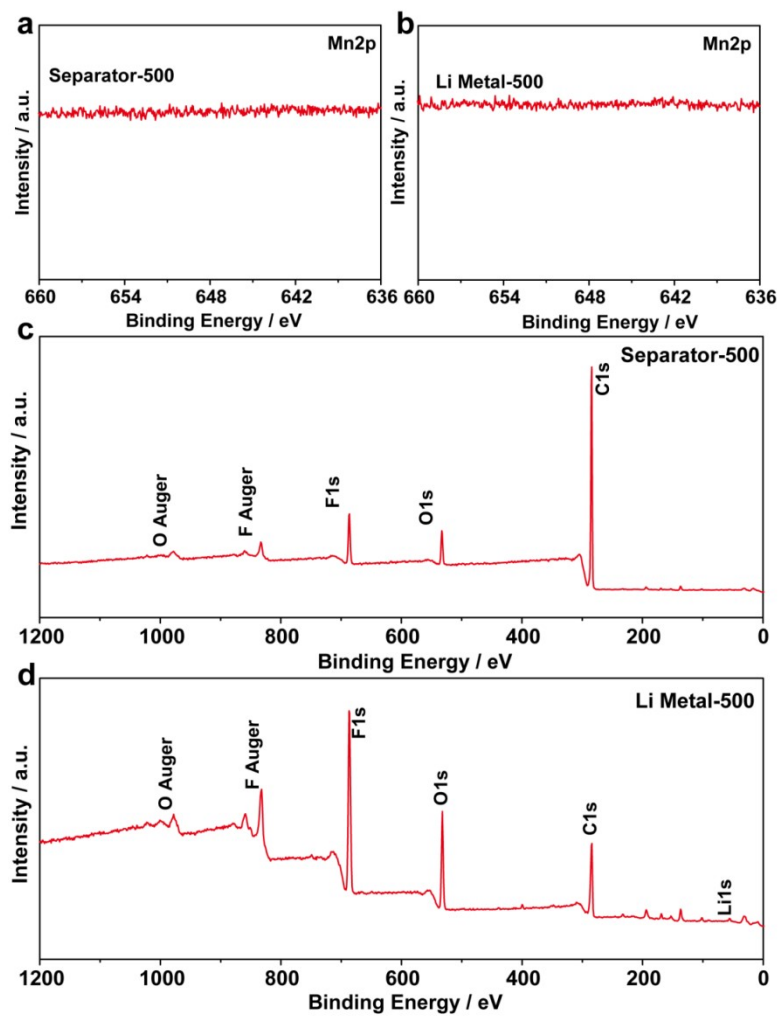

**Figure S14.** (a-d) XPS spectra of Mn element of the lithium metal and separator collected after 500 cycles.

**Table S1.** Crystallographic parameters of LNMO-111 refined by the Rietveld method.

| Site              | x                                 | y                      | z                       | occ.                                                   |
|-------------------|-----------------------------------|------------------------|-------------------------|--------------------------------------------------------|
| Li                | 0.1250(0)                         | 0.1250(0)              | 0.1250(0)               | 1                                                      |
| Ni                | 0.5000(0)                         | 0.5000(0)              | 0.5000(0)               | 0.25                                                   |
| Mn                | 0.5000(0)                         | 0.5000(0)              | 0.5000(0)               | Mn <sup>4+</sup> (0.7238)<br>Mn <sup>3+</sup> (0.0262) |
| O                 | 0.2632(0)                         | 0.2632(0)              | 0.2632(0)               | 1                                                      |
| a = 8.1726(1) (Å) | V = 545.8629(6) (Å <sup>3</sup> ) | R <sub>p</sub> = 6.22% | R <sub>wp</sub> = 9.43% |                                                        |

**Table S2.** ICP-MS results of the LNMO-111.

| Theoretical chemical<br>formula | Measured atomic ratio |       |       |
|---------------------------------|-----------------------|-------|-------|
|                                 | Li                    | Ni    | Mn    |
| LNMO-111                        | 0.998                 | 0.499 | 1.501 |
